# Supplementary material
Source: PubMed Central journal article supplement (PMC5714593)
Supplement: mmc1.pdf [file mmc1.pdf]

# THE LANCET Psychiatry

## Supplementary appendix

This appendix formed part of the original submission and has been peer reviewed. We post it as supplied by the authors.

Supplement to: Jahoda A, Hastings R, Hatton C, et al. Comparison of behavioural activation with guided self-help for treatment of depression in adults with intellectual disabilities: a randomised controlled trial. *Lancet Psychiatry* 2017; published online Nov 16. [http://dx.doi.org/10.1016/S2215-0366\(17\)30426-1](http://dx.doi.org/10.1016/S2215-0366(17)30426-1).

|                                     | <i>ITT Population</i> |                           |         | <i>PP Population</i> |                           |         |
|-------------------------------------|-----------------------|---------------------------|---------|----------------------|---------------------------|---------|
|                                     | N                     | Between-group difference* | p-value | N                    | Between-group difference* | p-value |
| <b>GDS-LD</b>                       |                       |                           |         |                      |                           |         |
| Post-intervention (4 months)        | 68, 72                | -0.75 (-2.80, 1.31)       | 0.471   | 59, 61               | -0.28 (-2.59, 2.03)       | 0.810   |
| Follow-up (12 months)               | 65, 70                | 0.26 (-2.18, 2.70)        | 0.833   | 55, 59               | -0.03 (-2.39, 2.34)       | 0.982   |
| <b>IDDS</b>                         |                       |                           |         |                      |                           |         |
| Post-intervention (4 months)        | 65, 70                | -4.49 (-13.72, 4.75)      | 0.336   | 58, 60               | -1.48 (-11.19, 8.24)      | 0.762   |
| Follow-up (12 months)               | 63, 66                | 1.36 (-9.19, 11.92)       | 0.797   | 54, 57               | -1.95 (-13.46, 9.56)      | 0.735   |
| <b>GAS-ID</b>                       |                       |                           |         |                      |                           |         |
| Post-intervention (4 months)        | 68, 72                | -0.77 (-3.38, 1.84)       | 0.559   | 59, 61               | -1.10 (-4.02, 1.82)       | 0.453   |
| Follow-up (12 months)               | 65, 70                | 0.43 (-2.59, 3.45)        | 0.776   | 55, 59               | -0.53 (-3.60, 2.53)       | 0.729   |
| <b>BPI-S</b>                        |                       |                           |         |                      |                           |         |
| Post-intervention (4 months)        | 66, 69                | -0.65 (-1.55, 0.25)       | 0.154   | 58, 60               | -0.33 (-1.24, 0.59)       | 0.480   |
| Follow-up (12 months)               | 64, 67                | -0.67 (-1.46, 0.12)       | 0.093   | 55, 57               | -0.42 (-1.07, 0.24)       | 0.205   |
| <b>EQ-5D-Y</b>                      |                       |                           |         |                      |                           |         |
| Post-intervention (4 months)        | 68, 71                | 0.01 (-0.12, 0.14)        | 0.878   | 59, 61               | -0.01 (-0.14, 0.13)       | 0.924   |
| Follow-up (12 months)               | 65, 69                | 0.04 (-0.08, 0.15)        | 0.546   | 55, 59               | -0.03 (-0.16, 0.10)       | 0.626   |
| <b>EQ-5D-VAS</b>                    |                       |                           |         |                      |                           |         |
| Post-intervention (4 months)        | 68, 72                | 8.15 (-1.16, 17.45)       | 0.085   | 59, 61               | 6.21 (-4.18, 16.60)       | 0.236   |
| Follow-up (12 months)               | 65, 70                | 6.75 (-3.07, 16.56)       | 0.174   | 55, 59               | 6.33 (-4.68, 17.33)       | 0.254   |
| <b>ICI (total)</b>                  |                       |                           |         |                      |                           |         |
| Post-intervention (4 months)        | 68, 72                | 3.23 (-0.33, 6.78)        | 0.074   | 59, 61               | 2.46 (-1.59, 6.50)        | 0.230   |
| Follow-up (12 months)               | 66, 69                | 3.11 (-0.68, 6.91)        | 0.106   | 56, 58               | 2.31 (-1.93, 6.54)        | 0.280   |
| <b>IPDL</b>                         |                       |                           |         |                      |                           |         |
| Post-intervention (4 months)        | 68, 72                | -0.51 (-2.16, 1.14)       | 0.539   | 59, 61               | -0.95 (-2.80, 0.89)       | 0.305   |
| Follow-up (12 months)               | 66, 69                | 0.75 (-1.11, 2.61)        | 0.424   | 56, 58               | 0.11 (-1.93, 2.15)        | 0.915   |
| <b>SSQ3—size of support network</b> |                       |                           |         |                      |                           |         |
| Post-intervention (4 months)        | 68, 72                | 0.09 (-0.68, 0.86)        | 0.823   | 59, 61               | 0.17 (-0.69, 1.03)        | 0.694   |
| Follow-up (12 months)               | 65, 69                | 0.04 (-0.79, 0.86)        | 0.932   | 55, 58               | 0.02 (-0.92, 0.96)        | 0.967   |
| <b>SSQ3—satisfaction</b>            |                       |                           |         |                      |                           |         |
| Post-intervention (4 months)        | 68, 72                | -0.02 (-0.17, 0.12)       | 0.741   | 59, 61               | -0.03 (-0.19, 0.14)       | 0.761   |
| Follow-up (12 months)               | 65, 69                | 0.001 (-0.15, 0.15)       | 0.987   | 55, 58               | -0.02 (-0.20, 0.15)       | 0.784   |
| <b>ABS—socialisation</b>            |                       |                           |         |                      |                           |         |
| Post-intervention (4 months)        | 67, 71                | 1.11 (0.20, 2.02)         | 0.017   | 58, 61               | 1.19 (0.17, 2.21)         | 0.023   |
| Follow-up (12 months)               | 66, 68                | 0.14 (-0.72, 0.10)        | 0.750   | 56, 58               | 0.11 (-0.82, 1.04)        | 0.819   |
| <b>ABS—self-direction</b>           |                       |                           |         |                      |                           |         |
| Post-intervention (4 months)        | 67, 71                | 0.98 (-0.15, 2.12)        | 0.089   | 58, 61               | 0.74 (-0.53, 2.01)        | 0.247   |
| Follow-up (12 months)               | 66, 68                | 0.13 (-1.13, 1.39)        | 0.838   | 56, 58               | -0.11 (-1.51, 1.29)       | 0.873   |
| <b>ABS—responsibility</b>           |                       |                           |         |                      |                           |         |
| Post-intervention (4 months)        | 67, 71                | -0.16 (-0.59, 0.27)       | 0.452   | 58, 61               | -0.24 (-0.72, 0.24)       | 0.321   |
| Follow-up (12 months)               | 66, 68                | -0.44 (-0.92, 0.05)       | 0.076   | 56, 58               | -0.42 (-0.99, 0.15)       | 0.147   |
| <b>EDSE</b>                         |                       |                           |         |                      |                           |         |
| Post-intervention (4 months)        | 66, 70                | 0.86 (-0.44, 2.16)        | 0.192   | 58, 60               | 0.65 (-0.82, 2.12)        | 0.380   |
| Follow-up (12 months)               | 64, 67                | -0.39 (-1.60, 0.83)       | 0.527   | 55, 57               | -0.62 (-1.96, 0.72)       | 0.356   |
| <b>BLESID</b>                       |                       |                           |         |                      |                           |         |
| Follow-up (12 months)               | 66, 69                | 0.25 (-0.34, 0.83)        | 0.406   | 56, 58               | 0.28 (-0.31, 0.86)        | 0.351   |

Supplementary Table 1: Intention to treat (ITT, as in main paper) and per protocol (PP) analyses. N columns show numbers of participants included from the Beat-It and Step-Up groups, respectively

|                              | <i>Complete Case Analysis</i> |                 | <i>Multiple Imputation</i> |                 |
|------------------------------|-------------------------------|-----------------|----------------------------|-----------------|
|                              | Between-group difference*     | <i>p</i> -value | Between-group difference*  | <i>p</i> -value |
| GDS-LD                       |                               |                 |                            |                 |
| Post-intervention (4 months) | -0.75 (-2.80, 1.31)           | 0.471           | -0.18 (-2.06, 1.69)        | 0.850           |
| Follow-up (12 months)        | 0.26 (-2.18, 2.70)            | 0.833           | -0.30 (-2.56, 1.96)        | 0.792           |

Supplementary Table 2: Complete case analyses of primary outcome (as in main paper) and multiple imputation analyses

|                          | <i>StepUp</i>     |              | <i>BeatIt</i>     |              |
|--------------------------|-------------------|--------------|-------------------|--------------|
|                          | Mean (SD)         | Used by (n)% | Mean (SD)         | Used by (n)% |
| Medication               | £807 (£1,409)     | 68 (93.2%)   | £862 (£1,718)     | 58 (85.3%)   |
| Daytime activities       | £8,096 (£11,301)  | 68 (93.2%)   | £8,496 (£11,766)  | 58 (85.3%)   |
| Hospital based services  | £1,011 (£3,419)   | 68 (93.2%)   | £859 (£2,182)     | 58 (85.3%)   |
| Community based services | £15,822 (£36,193) | 68 (93.2%)   | £15,512 (£32,685) | 58 (85.3%)   |
| Intervention             | £1050 (£310)      | 68 (93.2%)   | £1,788 (£506)     | 58 (85.3%)   |
| Total Costs              | £26,786 (£38,232) | 68 (93.2%)   | £27,158 (£35,751) | 58 (85.3%)   |

Supplementary Table 3: Total mean costs for complete cases only

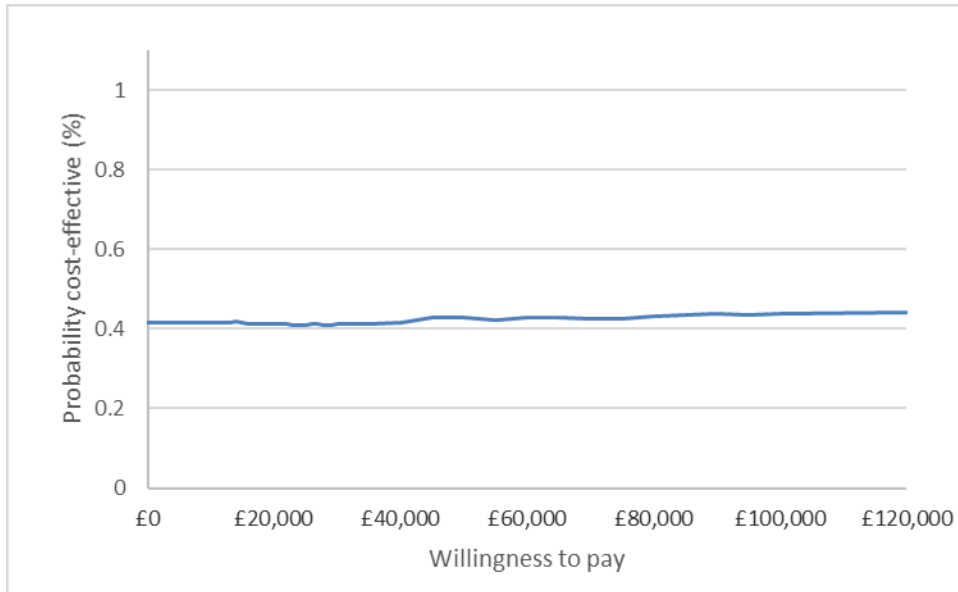

Supplementary Figure 1: Cost-effectiveness acceptability curve (multiple imputation, adjusted results)

At the current NICE £30,000 willingness-to-pay threshold there is a 41.1% chance of BeatIt being cost-effective compared to StepUp, this does not alter significantly as the threshold varies illustrating that the only certainty is that BeatIt is more costly than StepUp.
